# Supplementary material for: Systematic analysis of transcribed loci in ENCODE regions using RACE sequencing reveals extensive transcription in the human genome
Source: Springer Nature journal article supplement (doi:10.1186/gb-2008-9-1-r3), 2008-01-03

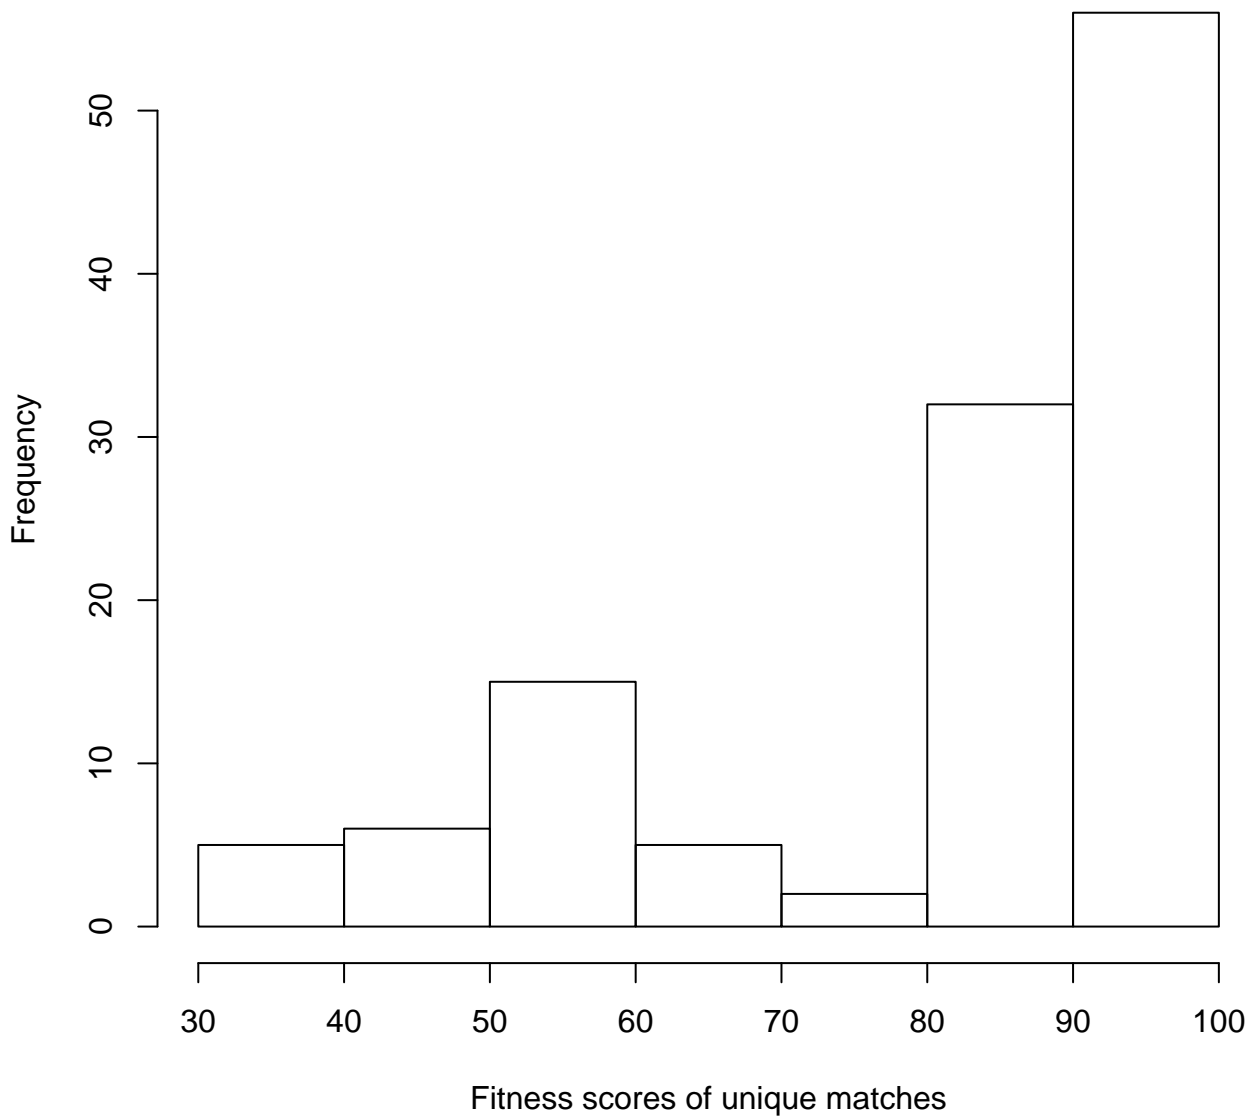

Supplement: Additional file 2 [file gb-2008-9-1-r3-s2.pdf]
